# Supplementary material
Source: PubMed Central journal article supplement (PMC4889251)
Supplement: kccy-15-08-1152429-s001.pdf [file kccy-15-08-1152429-s001.pdf]

**Supplementary Table 1. Jade-1S.GFP interactors identified by mass spectrometry.** The table indicates logarithmic fold changes for the Jade-1S WT pulldown and p-values for every identified protein as compared to a control GFP.GFP pulldown.

| Gene           | Protein                                          | Fold change<br>(Log2) | Significance<br>(-Log p) |
|----------------|--------------------------------------------------|-----------------------|--------------------------|
| <i>Phf17</i>   | Protein Jade-1                                   | 11.58748388           | 6.488407816              |
| <i>Kat7</i>    | Histone acetyltransferase KAT7                   | 9.896674633           | 6.413039082              |
| <i>Hdgfrp2</i> | Hepatoma-derived growth factor-related protein 2 | 3.858736992           | 3.559511646              |

**Supplementary Table 2. Jade-1S S18/20A.GFP interactors identified by mass spectrometry.** The table indicates logarithmic fold changes for the Jade-1S S18/S20A pulldown and p-values for every identified protein as compared to a control GFP.GFP pulldown.

| Gene              | Protein                                          | Fold change<br>(Log2) | Significance<br>(-Log p) |
|-------------------|--------------------------------------------------|-----------------------|--------------------------|
| <i>Phf17</i>      | Protein Jade-1                                   | 11.28538847           | 5.622053751              |
| <i>Kat7</i>       | Histone acetyltransferase KAT7                   | 9.998484135           | 5.691176154              |
| <i>Bysl</i>       | Bystin                                           | 5.147125721           | 2.453458798              |
| <i>Ccdc86</i>     | Coiled-coil domain-containing protein 86         | 4.674025059           | 2.926472001              |
| <i>Ddx18</i>      | ATP-dependent RNA helicase DDX18                 | 4.60942173            | 1.675659649              |
| <i>Abcf1</i>      | ATP-binding cassette sub-family F member 1       | 4.450901508           | 2.283493119              |
| --                | Uncharacterized protein C1orf131 homolog         | 4.327228069           | 2.776066148              |
| <i>Rps19bp1</i>   | Active regulator of SIRT1                        | 4.254776955           | 2.266449296              |
| <i>Polr2b</i>     | DNA-directed RNA polymerase II subunit RPB2      | 4.063534737           | 2.011842407              |
| <i>Rrp12</i>      | RRP12-like protein                               | 4.024551392           | 1.953322369              |
| <i>Hdgfrp2</i>    | Hepatoma-derived growth factor-related protein 2 | 4.002706051           | 4.488044798              |
| <i>Eif5b</i>      | Eukaryotic translation initiation factor 5B      | 3.979580879           | 2.400242102              |
| <i>D8Ertd738e</i> | Leydig cell tumor 10 kDa protein homolog         | 3.970445156           | 2.641480205              |
| <i>Aatf</i>       | Protein AATF                                     | 3.967655659           | 2.271990917              |
| <i>Ttf1</i>       | Transcription termination factor 1               | 3.535679817           | 2.191032725              |

|                      |                                                                          |             |             |
|----------------------|--------------------------------------------------------------------------|-------------|-------------|
| <i>Cd3eap</i>        | DNA-directed RNA polymerase I subunit RPA34                              | 3.484514713 | 3.529631828 |
| <i>Hmgn1</i>         | Non-histone chromosomal protein HMG-14                                   | 3.413878918 | 1.287837819 |
| <i>Dnttip2</i>       | Deoxynucleotidyltransferase terminal-interacting protein 2               | 3.273286343 | 2.85628776  |
| <i>Topors</i>        | E3 ubiquitin-protein ligase Topors                                       | 3.225662231 | 1.514399324 |
| <i>Phf20l1</i>       | PHD finger protein 20-like protein 1                                     | 3.208351135 | 2.091799544 |
| <i>Map1a</i>         | Microtubule-associated protein 1A;MAP1A heavy chain;MAP1 light chain LC2 | 3.177492142 | 1.729608182 |
| <i>Phf2</i>          | Lysine-specific demethylase PHF2                                         | 3.154909134 | 2.12114184  |
| <i>Gatad2b</i>       | Transcriptional repressor p66-beta                                       | 3.112024307 | 2.313645402 |
| <i>Nol10</i>         | Nucleolar protein 10                                                     | 3.10989809  | 2.46912873  |
| <i>Ftsj3</i>         | pre-rRNA processing protein FTSJ3                                        | 2.967365742 | 2.465863831 |
| <i>Sfswap</i>        | Splicing factor, suppressor of white-apricot homolog                     | 2.905473232 | 2.230120357 |
| <i>1810009A15Rik</i> | RIKEN cDNA 1810009A15 gene                                               | 2.904718399 | 2.245193781 |
| <i>Chd3</i>          | chromodomain helicase DNA binding protein 3                              | 2.885787964 | 1.845282622 |
| <i>Mrps12</i>        | 28S ribosomal protein S12, mitochondrial                                 | 2.828429222 | 1.516774648 |
| <i>Atp5j2</i>        | ATP synthase subunit f, mitochondrial                                    | 2.8143363   | 1.977281954 |
| <i>Gpatch8</i>       | G patch domain-containing protein 8                                      | 2.72851181  | 6.026863015 |
| <i>Smarca2</i>       | Probable global transcription activator SNF2L2                           | 2.651977062 | 1.715837729 |
| <i>Bud13</i>         | BUD13 homolog                                                            | 2.639995575 | 2.259977428 |
| <i>Ubn1</i>          | Ubinuclein-1                                                             | 2.635416508 | 2.901711303 |
| <i>Kdm5a</i>         | Lysine-specific demethylase 5A                                           | 2.485868454 | 4.377375752 |
| <i>Mta2</i>          | Metastasis-associated protein MTA2                                       | 2.452382088 | 1.568135899 |
| <i>Top1</i>          | DNA topoisomerase 1                                                      | 2.412335873 | 2.527779341 |
| <i>Chd4</i>          | Chromodomain-helicase-DNA-binding protein 4                              | 2.410351276 | 2.957226059 |
| <i>Nop58</i>         | Nucleolar protein 58                                                     | 2.371155262 | 2.78311789  |
| <i>Rsl1d1</i>        | ribosomal L1 domain containing 1                                         | 2.312812805 | 2.100260839 |
| <i>Hmgxb4</i>        | HMG box domain containing 4                                              | 2.286305428 | 2.66130905  |
| <i>Scaf1</i>         | Splicing factor, arginine/serine-rich 19                                 | 2.27781105  | 2.372854053 |
| <i>Rpl23a</i>        | 60S ribosomal protein L23a                                               | 2.272258759 | 1.922928396 |

|                 |                                           |             |             |
|-----------------|-------------------------------------------|-------------|-------------|
| <i>Ddx27</i>    | Probable ATP-dependent RNA helicase DDX27 | 2.250379562 | 2.37004764  |
| <i>Bbx</i>      | HMG box transcription factor BBX          | 2.183432102 | 3.042825676 |
| <i>Hist1h1b</i> | Histone H1.5                              | 2.136013985 | 2.736942831 |
| <i>Usp16</i>    | Ubiquitin carboxyl-terminal hydrolase 16  | 2.118464947 | 2.483403005 |
| <i>Cwc25</i>    | Pre-mRNA-splicing factor CWC25 homolog    | 2.077371597 | 2.738245935 |
| <i>Puf60</i>    | Poly(U)-binding-splicing factor PUF60     | 2.048453808 | 2.502633072 |
| <i>Nop56</i>    | Nucleolar protein 56                      | 2.034843922 | 2.975545479 |
| <i>Pogz</i>     | Pogo transposable element with ZNF domain | 2.0273242   | 2.101907157 |
| <i>Gtpbp4</i>   | Nucleolar GTP-binding protein 1           | 1.916981697 | 2.573997237 |
| <i>Fbl</i>      | rRNA 2-O-methyltransferase fibrillarin    | 1.838469028 | 3.170211469 |
